# Supplementary material
Source: publisher figshare collection journal article supplement (https://gsapubs.figshare.com/ndownloader/files/22399470)
Supplement: Supplementary file 1 [file 22399470]

## Sheet: Supp Table 3 M29
EXP	SITE	HOLE	CORE	SECTION	TOP_ DEPTH (cm)	BOTTOM_DEPTH (cm)	Meters composite depth (mcd) top (m)	Depth range	Best estimate of Depth	Barren (no benthic foraminifera)	% planktonics	agglutinants	Alabamina sp.	Anomalinoides spp.	Astacolus dubious	Bolivina calvertensis	Bolivina floridana	Bolivina marginata (incl. var. multicostata	Bolivina paula	Bolivina paula (striate form)	Bolivina plicatella	Bolivina spp.	Bulimina curta	Bulimina elongata & gracilis	Bulmina mexicana	Buliminella elegantissima	Cancris communis	Cassidulina laevigata	Cassidulinoides bradyi	Chilostomella oolina	Cibicides lobatulus	Cibicidoides pachyderma	Coryphostoma georgiana	Dentalina communis	Fursenkoina fusiformis	Fursenkoina mexicana	Fursenkoina punctata	Globobulimina sp.	Globocassidulina subglobosa	Gyroidinoides spp.	Hanzawaia hughesi	Hanzawaia mantaensis	Hanzawaia sp. 1	Hanzawaia sp. 2	Lagena, Oolina, Fissurina	Lenticulina spp.	Marginulina marginulinoides	Marginulina sp.	Marginulinopsis spp.
313	29	A	49	1	11	13	277.17			0	0	0	0	0	0	0	0	0	0	0	0	0	0	0	0	0	0	0	0	0	0	0	0	0	0	0	0	0	0	0	0	0	0	0	0	0	0	0	0
313	29	A	50	1	70	72	280.81			0	0	0	0	0	0	0	0	0	0	0	0	0	0	0	0	0	0	0	0	0	0	0	0	0	0	0	0	0	0	0	0	0	0	0	0	0	0	0	0
313	29	A	50	2	70	72	282.32			0	0	0	0	0	0	0	0	0	0	0	0	0	0	0	0	0	0	0	0	0	0	0	0	0	0	0	0	0	0	0	0	0	0	0	0	0	0	0	0
313	29	A	51	1	73	75	283.89			0	0	0	0	0	0	0	0	0	0	0	0	0	0	0	0	0	0	0	0	0	0	0	0	0	0	0	0	0	0	0	0	0	0	0	0	0	0	0	0
313	29	A	51	2	60	62	285.25			0	0	0	0	0	0	0	0	0	0	0	0	0	0	0	0	0	0	0	0	0	0	0	0	0	0	0	0	0	0	0	0	0	0	0	0	0	0	0	0
313	29	A	53	1	68	70	289.94			0	0	0	0	0	0	0	0	0	0	0	0	0	0	0	0	0	0	0	0	0	0	0	0	0	0	0	0	0	0	0	0	0	0	0	0	0	0	0	0
313	29	A	53	2	68	70	291.44			0	0	0	0	0	0	0	0	0	0	0	0	0	0	0	0	0	0	0	0	0	0	0	0	0	0	0	0	0	0	0	0	0	0	0	0	0	0	0	0
313	29	A	52	1	9	11	286.3			0	0	0	0	0	0	0	0	0	0	0	0	0	0	0	0	0	0	0	0	0	0	0	0	0	0	0	0	0	0	0	0	0	0	0	0	0	0	0	0
313	29	A	54	1	26	28	292.57			0	0	0	0	0	0	0	0	0	0	0	0	0	0	0	0	0	0	0	0	0	0	0	0	0	0	0	0	0	0	0	0	0	0	0	0	0	0	0	0
313	29	A	56	1	37	39	294.89			0	0	0	0	0	0	0	0	0	0	0	0	0	0	0	0	0	0	0	0	0	0	0	0	0	0	0	0	0	0	0	0	0	0	0	0	0	0	0	0
313	29	A	57	1	70	72	299.11			0	0	0	0	0	0	0	0	0	0	0	0	0	0	0	0	0	0	0	0	0	0	0	0	0	0	0	0	0	0	0	0	0	0	0	0	0	0	0	0
313	29	A	57	2	40	42	300.31			0	0	0	0	0	0	0	0	0	0	0	0	0	0	0	0	0	0	0	0	0	0	0	0	0	0	0	0	0	0	0	0	0	0	0	0	0	0	0	0
313	29	A	58	1	73	75	302.19			0	0	0	0	0	0	0	0	0	0	0	0	0	0	0	0	0	0	0	0	0	0	0	0	0	0	0	0	0	0	0	0	0	0	0	0	0	0	0	0
313	29	A	59	1	68	70	305.19			0	0	0	0	0	0	0	0	0	0	0	0	0	0	0	0	0	0	0	0	0	0	0	0	0	0	0	0	0	0	0	0	0	0	0	0	0	0	0	0
313	29	A	59	2	49	51	306.5			0	0	0	0	0	0	0	0	0	0	0	0	0	0	0	0	0	0	0	0	0	0	0	0	0	0	0	0	0	0	0	0	0	0	0	0	0	0	0	0
313	29	A	61	1	73	75	311.34			0	0	0	0	0	0	0	0	0	0	0	0	0	0	0	0	0	0	0	0	0	0	0	0	0	0	0	0	0	0	0	0	0	0	0	0	0	0	0	0
313	29	A	61	2	47	49	312.58			0	0	0	0	0	0	0	0	0	0	0	0	0	0	0	0	0	0	0	0	0	0	0	0	0	0	0	0	0	0	0	0	0	0	0	0	0	0	0	0
313	29	A	60	1	70	72	308.26			0	0	0	0	0	0	0	0	0	0	0	0	0	0	0	0	0	0	0	0	0	0	0	0	0	0	0	0	0	0	0	0	0	0	0	0	0	0	0	0
313	29	A	60	2	70	72	309.76			0	0	0	0	0	0	0	0	0	0	0	0	0	0	0	0	0	0	0	0	0	0	0	0	0	0	0	0	0	0	0	0	0	0	0	0	0	0	0	0
313	29	A	62	1	73	75	314.39			0	0	0	0	0	0	0	0	0	0	0	0	0	0	0	0	0	0	0	0	0	0	0	0	0	0	0	0	0	0	0	0	0	0	0	0	0	0	0	0
313	29	A	62	2	20	22	315.35			0	0	0	0	0	0	0	0	0	0	0	0	0	0	0	0	0	0	0	0	0	0	0	0	0	0	0	0	0	0	0	0	0	0	0	0	0	0	0	0
313	29	A	63	1	61	63	317.32			0	0	0	0	0	0	0	0	0	0	0	0	0	0	0	0	0	0	0	0	0	0	0	0	0	0	0	0	0	0	0	0	0	0	0	0	0	0	0	0
313	29	A	63	2	12	14	318.09			0	0	0	0	0	0	0	0	0	0	0	0	0	0	0	0	0	0	0	0	0	0	0	0	0	0	0	0	0	0	0	0	0	0	0	0	0	0	0	0
313	29	A	64	1	75	77	320.51			0	0	0	0	0	0	0	0	0	0	0	0	0	0	0	0	0	0	0	0	0	0	0	0	0	0	0	0	0	0	0	0	0	0	0	0	0	0	0	0
313	29	A	64	2	45	47	321.71			0	0	0	0	0	0	0	0	0	0	0	0	0	0	0	0	0	0	0	0	0	0	0	0	0	0	0	0	0	0	0	0	0	0	0	0	0	0	0	0
313	29	A	65	1	73	75	323.54			0	0	0	0	0	0	0	0	0	0	0	0	0	0	0	0	0	0	0	0	0	0	0	0	0	0	0	0	0	0	0	0	0	0	0	0	0	0	0	0
313	29	A	65	2	77	79	325.09			0	0	0	0	0	0	0	0	0	0	0	0	0	0	0	0	0	0	0	0	0	0	0	0	0	0	0	0	0	0	0	0	0	0	0	0	0	0	0	0
313	29	A	66	1	74.5	76	326.605			0	0	0	0	0	0	0	0	0	0	0	0	0	0	0	0	0	0	0	0	0	0	0	0	0	0	0	0	0	0	0	0	0	0	0	0	0	0	0	0
313	29	A	66	2	29	31	327.65			0	0	0	0	0	0	0	0	0	0	0	0	0	0	0	0	0	0	0	0	0	0	0	0	0	0	0	0	0	0	0	0	0	0	0	0	0	0	0	0
313	29	A	67	1	76	77.5	329.67			0	0	0	0	0	0	0	0	0	0	0	0	0	0	0	0	0	0	0	0	0	0	0	0	0	0	0	0	0	0	0	0	0	0	0	0	0	0	0	0
313	29	A	67	2	76	77.5	331.17			0	0	0	0	0	0	0	0	0	0	0	0	0	0	0	0	0	0	0	0	0	0	0	0	0	0	0	0	0	0	0	0	0	0	0	0	0	0	0	0
313	29	A	68	1	75	76.5	332.71	25-50	25-50		0.914634	0	0	0	0	0	0	1.23077	0.307692	0	0	0	0	3.69231	0	0	0.307692	0	0	0	0	0	0	0	0	0	0	0	0	0	0	0	10.7692	0	0.615385	3.07692	0	0	0
313	29	A	68	2	77	79	334.23	25-80	40-60		0	0	0	0	0	0	0.925926	7.40741	0	0	0.925926	0	0	0.925926	0	0	0	0	0	0	0	0	0	0.925926	0	0	0	0	0	0	0	0	12.037	0	0.925926	28.7037	0	0	3.7037
313	29	A	69	1	75	77	335.76	75-100	75-100		1.58103	0	0	0	0	0	0	5.22088	0	0	0	0	4.01606	5.22088	0	0	0	0	0	0	0	0	0	0	0	0	0	0	0	0	0	0	1.20482	0	1.20482	18.4739	0	0	0
313	29	A	69	2	75	77	337.27	75-100	75-100		2.17865	0	0	0	0	0	0	10.0223	0.445434	0	0	0	20.7127	0	0	0	0	0	0	0	0	0	0	0.222717	0	0	0	0	0	0	0	0	0.890869	0	0.668151	8.01782	0	0	0.445434
313	29	A	70	1	75	76.5	338.81	75-100	75-100		0.849858	0	0	0	0	0	0	2.28571	1.71429	0	0	0	0	2.57143	0	0	0	0	0	0	0	0	0	0	0	0	0	0	0	0	0	0	1.42857	0	0	14	0	0	0
313	29	A	72	1	80	83	344.12			0	0	0	0	0	0	0	0	0	0	0	0	0	0	0	0	0	0	0	0	0	0	0	0	0	0	0	0	0	0	0	0	0	0	0	0	0	0	0	0
313	29	A	72	2	37	39	345.18			0	0	0	0	0	0	0	0	0	0	0	0	0	0	0	0	0	0	0	0	0	0	0	0	0	0	0	0	0	0	0	0	0	0	0	0	0	0	0	0
313	29	A	73	1	70	72	347.07			0	0	0	0	0	0	0	0	0	0	0	0	0	0	0	0	0	0	0	0	0	0	0	0	0	0	0	0	0	0	0	0	0	0	0	0	0	0	0	0
313	29	A	73	2	70	72	348.57			0	0	0	0	0	0	0	0	0	0	0	0	0	0	0	0	0	0	0	0	0	0	0	0	0	0	0	0	0	0	0	0	0	0	0	0	0	0	0	0
313	29	A	73	3	25	27	349.62			0	0	0	0	0	0	0	0	0	0	0	0	0	0	0	0	0	0	0	0	0	0	0	0	0	0	0	0	0	0	0	0	0	0	0	0	0	0	0	0
313	29	A	74	1	73	76	350.99	25-50	25-50		0.892857	0	0	0	0	0	0	0	0	0	0	0	0	9.90991	0.900901	0	3.6036	0	0	0	0	0	0	0	0	0	0	0	0	0	1.8018	0	5.40541	0	0.900901	7.20721	0	0	0.900901
313	29	A	74	2	40	43	352.16			0	0	0	0	0	0	0	0	0	0	0	0	0	0	0	0	0	0	0	0	0	0	0	0	0	0	0	0	0	0	0	0	0	0	0	0	0	0	0	0
313	29	A	75	1	40	43	353.71	25-50	50		0.666667	0	0	0	0	0	0	0	0	0	0	0	0	10.7383	0	0	1.34228	0	0	0	0	0	0	0	0	0	0	0	0	0	13.4228	0	2.68456	0	0	10.7383	0	0	2.68456
313	29	A	76	1	68	70	355.03			0	0	0	0	0	0	0	0	0	0	0	0	0	0	0	0	0	0	0	0	0	0	0	0	0	0	0	0	0	0	0	0	0	0	0	0	0	0	0	0
313	29	A	76	2	40	42	356.24	25-50	25-50		0.510204	0	0	0	0	0	0	0	0	0	0	0	0	9.23077	0	0	0	0	0	0	1.53846	0	0	0	0	0	0	0	0	0	26.1538	0	0	0	1.02564	9.23077	0	0	1.02564
313	29	A	77	1	75	77	357.11	25-50	25-50		0	0	0	0.684932	0	0	0	0	0	0	0	0	0	2.73973	0	0	0	0	0	0	0.684932	1.36986	0	0	0	0	0	0	0	0	45.8904	0	0	0	0	4.10959	0	0	0.684932
313	29	A	77	2	33	35	358.18	25-50	25-50		0	0	0	0	0	0	0	0	0	0	0	0	0	4.43038	0	0	0	0	0	0	0	0.632911	0	0	0	0	0	0	0	0	38.6076	0	0	0	0	6.96203	0	0	10.1266
313	29	A	78	1	73	75	360.14	25-50	25-50		0.636943	0	0	0	0	0	0	0	0	0	0	0	0	5.12821	0	0	0	0	0	0	0	3.84615	0	0	0	0	0	0	0	0	25	0.641026	0	0	0	6.41026	0	0	16.6667
313	29	A	78	2	73	75	361.67	25-50	25-50		0	0	0	0	0	0	0	0	0	0	0	0	0	2.99728	0	0	0	0	0	0	0	0	0	0	0	0	0	0	0	0	29.4278	0	1.63488	0	0.544959	7.35695	0	0	0
313	29	A	79	1	75	77	363.21	25-50	25-50		3.33333	0	0	0	0	0	0	0	0	0	0	0	0	3.44828	0	0	0	0	0	0	0	0	0	0	0	0	0	0	0	0	13.7931	0	0	0	0	0	0	0	0
313	29	A	79	2	74	77	364.7	10-50	25-50		4.29688	0	0	0	0	0	0	0	0	0	0	0	0	16.3265	0	0	0	0	0	0	0	0	0	0	0	0	0	0	0	0	43.6735	0	0	0	0.408163	0.408163	0	0	0
313	29	A	80	1	74	77	366.25	?50-80	?50-80		83.3333	0	0	0	0	0	0	0	0	0	0	0	0	100	0	0	0	0	0	0	0	0	0	0	0	0	0	0	0	0	0	0	0	0	0	0	0	0	0
313	29	A	81	1	75	77	369.31				25	0	0	0	0	0	0	0	0	0	0	0	0	0	0	0	0	0	0	0	0	0	0	0	0	0	0	0	0	0	0	0	0	0	0	100	0	0	0
313	29	A	81	2	70	72	370.56				0	0	0	0	0	0	0	0	0	0	0	0	0	100	0	0	0	0	0	0	0	0	0	0	0	0	0	0	0	0	0	0	0	0	0	0	0	0	0
313	29	A	81	3	24	26	371.41				0	0	0	0	0	0	0	0	0	0	0	0	0	0	0	0	0	0	0	0	0	0	0	0	0	0	0	0	0	0	0	0	0	0	0	100	0	0	0
313	29	A	82	1	75	77	372.36	50-80	50-80		44.2623	0	0	0	0	0	0	0	2.94118	0	0	0	0	5.88235	0	0	0	0	0	0	0	0	0	0	0	0	0	0	0	0	0	0	38.2353	0	2.94118	26.4706	0	0	0
313	29	A	82	2	54	55.5	373.65	50-80	50-80		11.6667	0	0	0	0	0	0	0	49.0566	0	0	0	0	11.3208	0	3.77358	0	0	0	0	0	0	0	0	0	0	0	0	0	0	0	0	24.5283	0	3.77358	0	0	0	0
313	29	A	83	1	75	78	375.41				0	0	0	0	0	0	0	0	0	0	0	0	0	0	0	0	0	0	0	0	0	0	0	0	0	0	0	0	0	0	0	0	0	0	0	100	0	0	0
313	29	A	83	2	60	63	376.76	50-80	50-80		5.95533	0	0	0	0	0	0	0	21.372	0	0	0	0	12.9288	0	5.01319	0	0	0	0	0	0	0	0	0	0	0.527704	0	0	0	0	0	23.219	0	0	7.65172	0	0	0
313	29	A	84	1	71	74	378.42	?50-80	?50-80		0	0	0	0	0	0	0	0	0	0	0	0	0	100	0	0	0	0	0	0	0	0	0	0	0	0	0	0	0	0	0	0	0	0	0	0	0	0	0
313	29	A	84	2	73	76	379.99	50-80	50-80		21.0526	0	0	0	0	0	6.66667	0	20	0	0	0	0	13.3333	0	13.3333	0	0	0	0	0	0	0	0	0	0	0	0	0	0	0	0	26.6667	0	0	6.66667	0	0	0
313	29	A	85	1	75	76.5	381.51	50-80	50-80		0	0	0	0	0	0	8.33333	0	41.6667	0	0	0	0	33.3333	0	0	0	0	0	0	0	0	0	0	0	0	0	0	0	0	0	0	8.33333	0	0	0	0	0	0
313	29	A	85	2	66	67.5	382.92	>0-10	>0-10		100	0	0	0	0	0	0	0	0	0	0	0	0	0	0	0	0	0	0	0	0	0	0	0	0	0	0	0	0	0	0	0	0	0	0	0	0	0	0
313	29	A	86	1	77.5	79	384.585			0	0	0	0	0	0	0	0	0	0	0	0	0	0	0	0	0	0	0	0	0	0	0	0	0	0	0	0	0	0	0	0	0	0	0	0	0	0	0	0
313	29	A	86	2	77	78.5	386.08	?50-80	?50-80		20	0	0	0	0	0	0	0	25	0	0	0	0	75	0	0	0	0	0	0	0	0	0	0	0	0	0	0	0	0	0	0	0	0	0	0	0	0	0
313	29	A	87	1	74	75.5	387.6	50-80	50-80		82.9268	0	0	0	0	0	4.7619	0	42.8571	0	0	0	4.7619	33.3333	0	4.7619	0	0	0	0	0	0	0	0	0	0	0	0	0	0	0	0	0	0	0	0	0	0	0
313	29	A	87	2	49	50.5	388.85			0	0	0	0	0	0	0	0	0	0	0	0	0	0	0	0	0	0	0	0	0	0	0	0	0	0	0	0	0	0	0	0	0	0	0	0	0	0	0	0
313	29	A	88	1	75	76.5	390.66			0	0	0	0	0	0	0	0	0	0	0	0	0	0	0	0	0	0	0	0	0	0	0	0	0	0	0	0	0	0	0	0	0	0	0	0	0	0	0	0
313	29	A	88	2	53	54.5	391.94			0	0	0	0	0	0	0	0	0	0	0	0	0	0	0	0	0	0	0	0	0	0	0	0	0	0	0	0	0	0	0	0	0	0	0	0	0	0	0	0
313	29	A	89	1	71	72.5	393.67	50-80	50-80		22.6994	0	0	0	0	0	7.93651	0	25.3968	0	0	0	1.5873	37.3016	0	3.1746	0	0	0	0	0	0	0	0	0	0	1.5873	0	0.793651	0	0	0	4.7619	0	0.793651	0	0	0	0
313	29	A	89	2	52.5	54	394.985	50-80	50-80		21.8391	0	0	0	0	0	1.47059	0	17.6471	0	0	0	0	41.1765	0	0	0	0	0	0	0	0	0	0	0	0	0	0	1.47059	0	0	0	4.41176	0	0	2.94118	0	0	0
313	29	A	90	1	70	71.5	396.71	?50-80	?50-80		0	0	0	0	0	0	20	0	0	0	0	0	0	60	0	0	0	0	0	0	0	0	0	0	0	0	0	0	0	0	0	0	0	0	0	0	0	0	0
313	29	A	90	2	70	71.5	398.2			0	0	0	0	0	0	0	0	0	0	0	0	0	0	0	0	0	0	0	0	0	0	0	0	0	0	0	0	0	0	0	0	0	0	0	0	0	0	0	0
313	29	A	91	1	70	71.5	399.76			0	0	0	0	0	0	0	0	0	0	0	0	0	0	0	0	0	0	0	0	0	0	0	0	0	0	0	0	0	0	0	0	0	0	0	0	0	0	0	0
313	29	A	91	2	70	71.5	401.26			0	0	0	0	0	0	0	0	0	0	0	0	0	0	0	0	0	0	0	0	0	0	0	0	0	0	0	0	0	0	0	0	0	0	0	0	0	0	0	0
313	29	A	92	1	73.5	75	402.845				33.3333	0	0	0	0	0	0	0	50	0	0	0	0	0	0	0	0	0	0	0	0	0	0	0	0	0	0	0	0	0	0	0	0	0	0	50	0	0	0
313	29	A	92	2	60	61.5	404.22				0	0	0	0	0	0	0	0	0	0	0	0	0	0	0	0	0	0	0	0	0	0	0	0	0	0	0	0	0	0	0	0	0	0	0	100	0	0	0
313	29	A	92	2	70	71.5	404.315	25-80	25-80		40	0	0	0	0	0	0	0	0	0	0	0	0	16.6667	0	0	0	0	0	0	0	0	0	0	0	0	0	0	0	0	0	0	0	0	0	16.6667	0	0	0
313	29	A	92	2	73.5	75	404.345	25-80	25-80		23.5294	0	0	0	0	0	0	0	15.3846	0	0	0	0	7.69231	0	0	0	0	0	0	0	0	0	0	0	0	0	0	0	0	0	0	0	0	0	7.69231	0	0	0
313	29	A	93	1	67.5	69	405.835			0	0	0	0	0	0	0	0	0	0	0	0	0	0	0	0	0	0	0	0	0	0	0	0	0	0	0	0	0	0	0	0	0	0	0	0	0	0	0	0
313	29	A	93	2	60	61.5	407.09			0	0	0	0	0	0	0	0	0	0	0	0	0	0	0	0	0	0	0	0	0	0	0	0	0	0	0	0	0	0	0	0	0	0	0	0	0	0	0	0
313	29	A	93	3	19	20.5	408.01			0	0	0	0	0	0	0	0	0	0	0	0	0	0	0	0	0	0	0	0	0	0	0	0	0	0	0	0	0	0	0	0	0	0	0	0	0	0	0	0
313	29	A	94	1	68.5	70	408.895	25-50	25-50		19.3548	0	0	0	0	0	0	0	4	0	0	0	0	8	0	0	0	0	0	0	0	0	0	0	0	0	0	0	0	0	0	0	0	0	0	38	0	0	0
313	29	A	94	2	60.5	62	410.315	50-80	50-80		28.0501	0	0	0	0	0	10.5797	0.57971	21.7391	0	0	0	11.4493	24.058	0.57971	0	0	0	0	0	0	0	0	0	0.144928	0	0.724638	0	0.144928	0	0	0	5.50725	0	0	8.11594	0	0	0
313	29	A	95	1	74	77	412	50-80	50-80		38.5714	0	0	0	0	0	1.16279	0	0	0	0	0	11.6279	36.0465	0	0	0	0	0	0	0	0	0	0	0	0	0	0	0	0	2.32558	0	3.48837	0	0	25.5814	0	0	0
313	29	A	95	2	74	77	413.5	50-80	50-80		39.726	0	0	0	0	0	0	0	6.81818	0	0	0	2.27273	18.1818	0	0	0	0	0	0	0	0	0	0	0	0	0	0	0	0	0	0	11.3636	0	0	50	0	0	0
313	29	A	96	1	76	79	415.07			0	0	0	0	0	0	0	0	0	0	0	0	0	0	0	0	0	0	0	0	0	0	0	0	0	0	0	0	0	0	0	0	0	0	0	0	0	0	0	0
313	29	A	96	2	72	75	416.53			0	0	0	0	0	0	0	0	0	0	0	0	0	0	0	0	0	0	0	0	0	0	0	0	0	0	0	0	0	0	0	0	0	0	0	0	0	0	0	0
313	29	A	97	1	74	77	418.1			0	0	0	0	0	0	0	0	0	0	0	0	0	0	0	0	0	0	0	0	0	0	0	0	0	0	0	0	0	0	0	0	0	0	0	0	0	0	0	0
313	29	A	97	2	74	77	419.6			0	0	0	0	0	0	0	0	0	0	0	0	0	0	0	0	0	0	0	0	0	0	0	0	0	0	0	0	0	0	0	0	0	0	0	0	0	0	0	0
313	29	A	98	2	58	61	421.14	50-80	50-80		89.0909	0	0	0	0	0	16.6667	0	58.3333	0	0	0	0	0	0	8.33333	0	0	0	0	0	0	0	0	0	0	8.33333	0	0	0	0	0	0	0	0	0	0	0	0
313	29	A	98	2	70	71	421.26	50-80	50-80		77.5	0	0	0	0	0	0	0	66.6667	0	0	0	0	22.2222	0	0	0	0	0	0	0	0	0	0	0	0	0	0	0	0	0	0	0	0	0	11.1111	0	0	0
313	29	A	99	1	70	73	424.16			0	0	0	0	0	0	0	0	0	0	0	0	0	0	0	0	0	0	0	0	0	0	0	0	0	0	0	0	0	0	0	0	0	0	0	0	0	0	0	0
313	29	A	99	2	62	65	425.58	50-80	50-80		77.5	0	0	0	0	0	0	0	55.5556	0	0	0	0	22.2222	0	11.1111	0	0	0	0	0	0	0	0	0	0	0	0	0	0	0	0	0	0	0	0	0	0	0
313	29	A	100	1	70	72	427.21	?50-80	?50-80		40	0	0	0	0	0	0	0	16.6667	0	0	0	0	50	0	0	0	0	0	0	0	0	0	0	0	0	0	0	0	0	0	0	0	0	0	33.3333	0	0	0
313	29	A	100	2	54	57	428.55	?50-80	?50-80		75	0	0	0	0	0	0	0	0	0	0	0	0	50	0	0	0	0	0	0	0	0	0	0	0	0	0	0	0	0	0	0	50	0	0	0	0	0	0
313	29	A	101	1	69	72	430.25	?50-80	?50-80		50	0	0	0	0	0	0	0	0	0	0	0	0	100	0	0	0	0	0	0	0	0	0	0	0	0	0	0	0	0	0	0	0	0	0	0	0	0	0
313	29	A	101	2	55	59	431.61	50-80	50-80		20.4082	0	0	0	0	0	0	0	0	0	0	0	0	12.8205	0	0	0	0	0	0	0	0	0	0	0	0	0	0	0	0	0	0	0	0	0	82.0513	0	0	0
313	29	A	102	1	68	71	433.29				0	0	0	0	0	0	0	0	0	0	0	0	0	0	0	0	0	0	0	0	0	0	0	0	0	0	0	0	0	0	0	0	0	0	0	100	0	0	0
313	29	A	102	2	65	68	434.8			0	0	0	0	0	0	0	0	0	0	0	0	0	0	0	0	0	0	0	0	0	0	0	0	0	0	0	0	0	0	0	0	0	0	0	0	0	0	0	0
313	29	A	104	1	92	95	439.63				0	0	0	0	0	0	0	0	0	0	0	0	0	0	0	0	0	0	0	0	0	0	0	0	0	0	0	0	0	0	0	0	0	0	0	100	0	0	0
313	29	A	105	1	70	73	439.71				0	0	0	0	0	0	0	0	0	0	0	0	0	0	0	0	0	0	0	0	0	0	0	0	0	0	0	0	0	0	0	0	0	0	0	100	0	0	0
313	29	A	105	2	48	51	441	?10-50	?10-50		0	0	0	0	0	0	0	0	0	0	0	0	0	0	0	0	0	0	0	0	0	0	0	0	0	0	0	0	0	0	0	0	0	0	0	75	0	0	0
313	29	A	106	1	80	83	442.56				0	0	0	0	0	0	0	0	0	0	0	0	0	0	0	0	0	0	0	0	0	0	0	0	0	0	0	0	0	0	0	0	0	0	0	100	0	0	0
313	29	A	106	2	84	87	444.1	10-50	10-50		0	0	0	0	0	0	0	0	0	0	0	0	0	0	0	0	0	0	0	0	0	0	0	0	0	0	0	0	0	0	0	0	0	0	0	85.7143	0	0	0
313	29	A	107	1	37	39	445.18				0	0	0	0	0	0	0	0	0	0	0	0	0	0	0	0	0	0	0	0	0	0	0	0	0	0	0	0	0	0	0	0	0	0	0	100	0	0	0
313	29	A	107	2	75	77	446.25				0	0	0	0	0	0	0	0	0	0	0	0	0	0	0	0	0	0	0	0	0	0	0	0	0	0	0	0	0	0	0	0	0	0	0	100	0	0	0
313	29	A	107	3	32	34	447.32	10-100	25-75		0	0	0	0	0	0	14.2857	0	0	0	0	0	0	6.34921	0	0	0	0	0	0	0	0	0	0	0	0	0	0	0	0	0	0	0	0	0	63.4921	0	0	0
313	29	A	109	1	74	75.5	451.65	75-100	75-100		1.47992	0	0	0	0	0	32.475	0.214592	0.143062	0	0	0	0	15.3076	4.00572	0	0	0	0	0	0	0	0	0.0715308	0	0	0	0	0.643777	0	0.286123	0	0	0	0	0.786838	0	0	0
313	29	A	109	2	74	75.5	453.15	75-100	75-100		2.589	0	0	0	0	0.110742	29.2359	0	1.10742	0.221484	0.110742	0	0	11.1849	0.996678	0	0	0	0	0	0	0	0	0	0	0	0.885936	0	1.43965	0	0.775194	0	0.110742	0.110742	0	0.442968	0	0	0
313	29	A	110	1	62.5	64	454.585	75-100	75-100		2.28659	0	0	0	0	0	6.55226	0	0.624025	0	0	0	0	14.9766	0.312012	0	0	0	0	0	0	0.156006	0	0	0	0	0	0	0.624025	0	0.468019	0.156006	0	0	0	0.936037	0	0	0
313	29	A	110	2	39	40.5	455.57	75-100	75-100		6.32911	0	0	0	0	0.900901	0	0	6.75676	1.8018	2.25225	0	2.25225	11.7117	0	0.45045	0	0	0	0	0	0	0	0	0	0	0	0	4.5045	0	3.15315	0	0	0	0	0.45045	0	0	0
313	29	A	111	1	70	71.5	457.71	25-80	40-60		3.35731	0	0	0	0	0.248139	0	0	7.44417	0	0.248139	0	0	27.0471	0	0	0	0	0	0	0	0.248139	0	0	0	0	0.248139	0	6.45161	0	2.72953	0	0.248139	0	0.248139	2.72953	0	0	0
313	29	A	111	2	70	71.5	459.21	25-80	40-60		6.13139	0	0	0	0	0	0.311042	0	9.02022	0	2.64386	0	0.155521	24.4168	0	0.155521	0	0	0	0	0	0.311042	0	0	0	0	0	0	2.17729	0	1.86625	0.466563	0.622084	0	0	3.88802	0	0	0
313	29	A	112	1	73	74.5	460.79	25-75	40-50		2.94118	0	0	0	0	0.606061	0	0	2.42424	0	1.21212	0	10.303	29.697	0	0	0	0	0	0	0	0	0	0	0	0	0	0	2.42424	0	7.87879	0	0	0	0	3.0303	0	0	0
313	29	A	113	1	75	77	463.86				0	0	0	0	0	0	0	0	0	0	0	0	0	100	0	0	0	0	0	0	0	0	0	0	0	0	0	0	0	0	0	0	0	0	0	0	0	0	0
313	29	A	114	1	70	72	466.86				0	0	0	0	0	0	0	0	0	0	0	0	0	6.06061	0	0	0	0	0	0	0	0	0	0	0	0	0	0	0	0	6.06061	0	0	0	0	66.6667	3.0303	0	0
313	29	A	114	2	70	72	468.36				0	0	0	0	0	0	0	0	0	0	0	0	0	0	0	0	0	0	0	0	0	0	0	0	0	0	0	0	0	0	0	0	0	0	0	0	100	0	0
313	29	A	115	1	70	71.5	469.91	25-100	50-75		3.10559	0	0	0	0	0	0.641026	0	1.28205	0	0	0	0	10.8974	0	0	1.92308	0	0	0	0	3.84615	0	0	0	0	0	0	0	0	21.7949	3.84615	0	0	0	10.8974	1.92308	0	0
313	29	A	115	2	28	29.5	470.99	10-50	25		3.60825	0	0	0	0.534759	0	0	1.06952	2.6738	0	0	0	0	2.13904	0	0	0.534759	0	0	0	0	1.06952	0	0	0.534759	0	0	0	0	0	48.6631	0	1.60428	0	0	12.8342	1.60428	0	0
313	29	A	116	1	75	77	473.01	10-50	25		0	0	0	0	0	0	0	0	3.7037	0	0	0	0	0	0	0	3.7037	0	0	0	0	11.1111	0	0	0	0	0	0	0	0	22.2222	0	7.40741	0	0	40.7407	3.7037	0	0
313	29	A	116	2	62	64	474.38	10-25	10-25		0	0	0	0	0	0	0	0	0	0	0	0	0	0	0	0	7.69231	0	0	0	0	0	0	0	0	0	0	0	0	0	53.8462	0	0	0	0	7.69231	30.7692	0	0
313	29	A	117	1	27	29	475.58			0	0	0	0	0	0	0	0	0	0	0	0	0	0	0	0	0	0	0	0	0	0	0	0	0	0	0	0	0	0	0	0	0	0	0	0	0	0	0	0
313	29	A	117	2	27	29	477.08			0	0	0	0	0	0	0	0	0	0	0	0	0	0	0	0	0	0	0	0	0	0	0	0	0	0	0	0	0	0	0	0	0	0	0	0	0	0	0	0
313	29	A	120	1	74	76	482.15	75-100	75-100		2.67753	0	0	0	0	0	4.66507	0	0	0	0	0	0.239234	0.239234	0.956938	0	0.837321	2.39234	0	0	0	3.11005	0	0	0.119617	0	0	0	0	0.119617	15.4306	1.79426	8.49282	0	0	3.82775	0	0	0
313	29	A	120	2	76	78	483.68	75-100	75-100		11.7417	0	0	0	0.443459	0	3.32594	0	0	0	0	0	0.443459	0.221729	0	0	0.665188	0.443459	0	0	0	10.4213	0	0	0	0	0	0	0	0.443459	26.6075	1.55211	11.7517	0.886918	0	9.53437	0.221729	0	0.221729
313	29	A	121	1	72	75	485.18	75-100	75-100		0	0	0	0	1.9802	0	0	0	0	0	0	0	0	0.990099	0	0	0.990099	0	0	0	0	15.8416	0	0	0	0	0	0	0	0	46.5347	0.990099	0	0	0	18.8119	0	0	0
313	29	A	121	2	72	75	486.69				0	0	0	0	0	0	0	0	0	0	0	0	0	0	0	0	0	0	0	0	0	0	0	0	0	0	0	0	0	0	0	0	0	0	0	100	0	0	0
313	29	A	123	1	71	73	491.27	75-100	75-100		3.75587	0	0	0	0	0	1.95122	0	2.43902	0	0.487805	0	0.487805	0.243902	1.46341	0	2.92683	0	0	0	0	8.53659	0	0	0	0	0	0	0	0	47.561	0.97561	1.21951	0	0	6.58537	0	0	0
313	29	A	123	2	71	73	492.77			0	0	0	0	0	0	0	0	0	0	0	0	0	0	0	0	0	0	0	0	0	0	0	0	0	0	0	0	0	0	0	0	0	0	0	0	0	0	0	0
313	29	A	124	1	75	79	494.36			0	0	0	0	0	0	0	0	0	0	0	0	0	0	0	0	0	0	0	0	0	0	0	0	0	0	0	0	0	0	0	0	0	0	0	0	0	0	0	0
313	29	A	124	2	68	72	495.8			0	0	0	0	0	0	0	0	0	0	0	0	0	0	0	0	0	0	0	0	0	0	0	0	0	0	0	0	0	0	0	0	0	0	0	0	0	0	0	0
313	29	A	125	1	78	81	497.44	75-100	75-100		0	0	0	0	0	1.00671	10.0671	0.671141	7.04698	0	0.671141	0	1.67785	0.33557	0.671141	0	2.68456	0	0	0	0	2.68456	0	0	0	0	0	0	0	0	24.4966	0	11.0738	2.01342	0.671141	2.68456	0	0	0
313	29	A	125	2	78	81	498.95			0	0	0	0	0	0	0	0	0	0	0	0	0	0	0	0	0	0	0	0	0	0	0	0	0	0	0	0	0	0	0	0	0	0	0	0	0	0	0	0
313	29	A	126	1	77	80	500.48			0	0	0	0	0	0	0	0	0	0	0	0	0	0	0	0	0	0	0	0	0	0	0	0	0	0	0	0	0	0	0	0	0	0	0	0	0	0	0	0
313	29	A	126	2	52	55	501.73	50-80	50-60		0	0	0	0	0	0	0	0	4.72441	0	0	0	0	9.44882	0	0	0	0	0	0	0	7.08661	0	0	0	0	0.787402	0	0	0	38.5827	0.787402	11.0236	0	0	12.5984	0	0	0
313	29	A	127	1	52	55	503.03	50-80	50-80		1.85185	0	0	0	1.25786	0	0	0	1.25786	0	0	0	0	46.5409	0.628931	0.628931	0	0	0	0	0	5.66038	0	0	0	0	0	0	0	0	10.6918	0.628931	10.0629	0	0	1.25786	0	0	0
313	29	A	127	2	72	75	504.26	50-80	50-80		0.471698	0	0	0	0	0	0	0	15.1659	0	0	0	0.473934	38.3886	0	0.473934	0	0	0	0	0.473934	2.36967	0	0	0	0	0	0	0	0	17.0616	0.947867	6.63507	0	0.473934	6.16114	0	0	0
313	29	A	127	3	32	35	505.36	50-80	50-80		3.84615	0	0	0	0.8	0	0	0	5.6	0.8	0.8	0	0	28.8	0	0.8	0	0	2.4	0	0	4.8	0	0	0	0	0	0	0	0	11.2	0	12.8	0	0	14.4	0	0	0
313	29	A	128	1	75	76.5	506.56	50-80	50-80		7.97872	0	0	0	0	0.578035	0	0	3.46821	0	1.15607	0	0	35.2601	0	0.578035	0	0	0.578035	0	0.578035	4.04624	0	0	0	0	0	0	0	0	8.09249	0	20.8092	0	0	9.24855	0	0	0
313	29	A	128	2	39	40.5	507.69	50-80	50-80		3.2	0	0	0	0	0	0	0	9.09091	0	0	0	0.826446	33.8843	0	0	0	0	0	0	0	0.826446	0	0	0	0	0	0	0	0	14.876	0	6.61157	0	0.826446	18.1818	0	0	0
313	29	A	128	3	49	51	508.55	50-80	50-80		0	0	0	0	0	0	0	0	0	0	0	0	0	20.8955	0	0	0	0	0	0	0	5.97015	0	0	0	0	0	0	0	0	22.3881	0	7.46269	0	0	23.8806	0	0	0
313	29	A	129	1	45	47	509.31	50-80	50-80		0	0	0	0	0	0	0	0	1	0	0	0	0	27	0	0	0	0	0	0	0	2	0	0	0	0	0	0	0	0	19	0	11	0	0	27	0	0	0
313	29	A	129	2	60	62	510.96	50-80	50-80		2.32558	0	0	0	0	0	0	0	9.52381	0	0	0	0	47.619	0	2.38095	0	0	0	0	0	1.19048	0	0	0	0	0	0	0	0	7.14286	0	8.33333	0	0	11.9048	0	0	0
313	29	A	130	1	91.5	93	512.825	50-80	50-80		3.66972	0	0	0	0	0	0	0	0.952381	0	0.952381	0	0	20.9524	0	0	0	0	0	0	0	1.90476	0	0	0	0	0	0	0	0	25.7143	0	10.4762	0	0	25.7143	0	0	0
313	29	A	131	1	60	61.5	515.56	?	?		0	0	0	0	0	0	0	0	1.6129	0	0	0	0	1.6129	0	0	0	0	0	0	0	1.6129	0	0	0	0	0	0	0	0	6.45161	0	0	0	0	82.2581	0	0	0
313	29	A	131	2	99	100.5	517.47	75-100	75-100		1.98675	0	0	0	0	0	1.35135	0	0	0	0	0	0	2.7027	0	0	0	0	0	0	0	3.37838	0	0	0	0	0	0	2.02703	0	11.4865	0	18.2432	0	0	13.5135	0	0	0
313	29	A	132	1	75	76.5	518.76	75-100	75-100		7.56303	0	0	0	0	0	0	0	0	0	0	0	0	4.54545	0	0	0	0	0	0	0	4.54545	0	0	0	0	0	0	0.909091	0	6.36364	0	5.45455	0	0.909091	34.5455	0	0	0
313	29	A	132	2	75	76.5	520.26	75-100	75-100		2.47934	0.847458	0	0	0	0	0	0	1.69492	0	0	0	0	1.69492	0	0.847458	0	0	0	0	0	0.847458	0	0	0	0	0	0	0.847458	0	3.38983	0.847458	4.23729	0	0	41.5254	0	0	0
313	29	A	133	1	69.5	71	521.755	0	0	0	0	0	0	0	0	0	0	0	0	0	0	0	0	0	0	0	0	0	0	0	0	0	0	0	0	0	0	0	0	0	0	0	0	0	0	0	0	0	0
313	29	A	133	2	65	66.5	523.12	75-100	75-100		7.5	0	0	0	0	0	0	0	1.35135	0	0	0	0	1.35135	0	0	0	0	0	0	0	6.75676	0	0	0	0	0	0.675676	0	0	17.5676	0	3.37838	0	0.675676	39.8649	0	0	0
313	29	A	134	1	17	18.5	524.28	75-100	75-100		10.5505	0	0	0	0.512821	0	0	0	0.512821	0	0	0	0	1.53846	0	0	0	0	1.02564	0	0	0	0	0	0	0	0	0.512821	1.53846	0	13.8462	0	6.66667	0.512821	1.02564	53.8462	0	0	0
313	29	A	135	1	80	81.5	527.96	75-100	75-100		5.11364	0	0	0	0	0	0	0	0	0	0	0	0	1.1976	0	0	0	0	0	0	0	0.598802	0	0.598802	0	0	0	0	1.1976	0	12.5749	0	4.19162	0	0	47.9042	0	0	0
313	29	A	136	1	70	71.5	528.16	75-100	75-100		0.47619	0	0	0	0	0	0	0	0	0	0	0	0	0.478469	0	0	0	0	0	0	0	0	0	0	0	0	0	0	0	0	11.4833	0	0.478469	0	0	52.1531	0.478469	0	0
313	29	A	137	1	75	77	530.96	75-100	75-100		0	0	0	0	0	0	0	0	0	0	0	0	0	0	0	0	0	0	0	0	0	0.970874	0	0	0	0	0	0	0	0	0	0	0	0	0	86.4078	0	0	0
313	29	A	137	2	75	76.5	532.47	75-100	75-100		16.6667	0	0	0	0	0	0	0	0	0	0	0	0	0	2.10526	0	0	0	0	0	0	0	0	0	0	0	0	0	0	0	1.05263	0	0	0	0	87.3684	0	0	0
313	29	A	138	1	70	71.5	533.96	75-100	75-100		11.3074	0	0	0	0	0.398406	0	0	0	0	0	0	0.796813	0.398406	4.78088	0	0	0	0	0	0	0.796813	0	0	0	0	0	0	0	0	4.78088	0	0.796813	0.796813	0	5.57769	0	0	0.398406
313	29	A	138	2	37.5	39	535.155	75-100	75-100		12.6214	0	0	0	0	0	0	0	0	0	0	0	0	0	0	0	0	0	0	0	0	0	0	0	0	0	0	0	0	0	0	0	0	0	0	14.4444	0	0	0
313	29	A	139	1	71	75	537.02	75-100	75-100		6.76692	0	0	0	0	0	0	0	0	0	0	0	0	0	2.41935	0	0	0	0	0	0	2.41935	0	0	0	0	0	0	0	0	8.06452	0	1.6129	0.806452	0	60.4839	0	0	0
313	29	A	140	1	30	34	539.61				0	0	0	0	0	0	0	0	0	0	0	0	0	0	0	0	0	0	0	0	0	0	0	0	0	0	0	0	0	0	0	0	0	0	0	100	0	0	0
313	29	A	141	1	55	59	543	75-100	75-100		7.81759	0	0	0	0	0	0.353357	0	0	0	0	0	0.706714	3.88693	0	0	0	0	0.353357	0	0	0.706714	0	0	0	0	0	0	1.41343	0	1.06007	0	1.06007	0.353357	0.706714	2.12014	0	0	0
313	29	A	141	2	57	61	544.48			0	0	0	0	0	0	0	0	0	0	0	0	0	0	0	0	0	0	0	0	0	0	0	0	0	0	0	0	0	0	0	0	0	0	0	0	0	0	0	0
313	29	A	142	1	70	73	546.16	75-100	75-100		0.555556	0	0	0	0	0	8.37989	0.558659	0	0	1.11732	0	0	0	0	0	0	0	0	0	0	4.46927	0	0	0	0	0	0	0	0	10.6145	0	7.26257	0	0	10.0559	0.558659	0	0
313	29	A	142	2	69	72	547.65			0	0	0	0	0	0	0	0	0	0	0	0	0	0	0	0	0	0	0	0	0	0	0	0	0	0	0	0	0	0	0	0	0	0	0	0	0	0	0	0
313	29	A	143	1	82	85	549.33			0	0	0	0	0	0	0	0	0	0	0	0	0	0	0	0	0	0	0	0	0	0	0	0	0	0	0	0	0	0	0	0	0	0	0	0	0	0	0	0
313	29	A	143	2	66	69	550.67	50-100	75		7.73481	0	0	0	0	0	1.79641	8.38323	1.1976	0	1.1976	0	3.59281	9.58084	0	0	0	0	0.598802	0	0	0.598802	0	0	0	0	0	0	0	0	4.79042	0	1.79641	0	0	4.19162	0	0	0
313	29	A	144	1	45	49	552.01	25-75	50-75		45.3165	0	0	0	0	0	35.6481	2.31481	0	0	0.462963	0	0.462963	7.87037	0	0	0	0	0	0	0	1.38889	0	0	0	0	0	0	0	0	5.09259	1.38889	6.48148	1.85185	0	1.85185	0	0	0
313	29	A	145	1	129	132	555.9	75-100	75-100		1.69014	0	0	0	0	0	0	0	0	0	0	0	0.286533	1.7192	0	0	0	0	0	0	0	0.286533	0	0	0	0	0	0	0.573066	0	1.14613	0.286533	0.573066	0	0	8.59599	0	0	0
313	29	A	147	1	60	62	558.26	75-100	75-100		1.41844	0	0	0	0	0	0	0.719424	0	0	0	0	0	3.59712	0	0	0	0	0	0	0	0.719424	0	0	0	0	0	0	0	0	0.719424	0	0	0	0	7.19424	0	0	0
313	29	A	148	1	38	41	561.09	75-100	75-100		3.59848	0	0	0	0	0	0	1.17878	0	0	0	0	0.392927	0.982318	0	0	0	0	0	0	0	0	0	0	0	0	0	0	0	0	0	0	0	0	0	2.94695	0	0	0
313	29	A	149	1	63.5	65	564.395	75-100	75-100		1.1976	0	0	0	0	0	0	0	0	0	0	0	0	2.42424	0	0	0	0.606061	0	0	0	0	0	0	0	0	0	0	0	0	0	0	0	0	0	16.9697	0	0	0
313	29	A	150	1	72.5	74	567.535	75-100	75-100		0	0	0	0	0	0	0	0	0	0	0	0	0.621118	6.21118	0	0	0	6.21118	0	0	0	1.86335	0	0	0	0	0	0	0	0	0	0	0	0	0	42.8571	0	0	0
313	29	A	151	1	57	58.5	570.43	75-100	75-100		12.782	0	0	0	0	0	0	0.431034	0	0	0	0	0.431034	4.74138	0	0	0	1.72414	0	0	0	0	0	0	0	0	0.431034	0	0	0	0.431034	0	0	0	0	3.44828	0	0	0
313	29	A	151	2	57	58.5	571.63	75-100	75-100		10.5769	0	0	0	0	0	0	0.537634	0	0	0	0	0	0.537634	0	0	0	3.76344	0	0	0	0	0	0	0	0	0	0	0	0	0	0	0	0	0	22.5806	0	0	0
313	29	A	152	1	75	76.5	573.66				0	0	0	0	0	0	0	0	0	0	0	0	0	0	0	0	0	0	0	0	0	0	0	0	0	0	0	0	0	0	0	0	0	0	0	0	0	0	0
313	29	A	153	1	60	61.5	576.56	25-50	25-50		29.0323	0	0	0	0	0	0	0	0	0	0	0	0	0	0	0	0	1.13636	0	0	0	0	0	1.13636	0	0	0	0	0	0	2.27273	1.13636	0	0	0	72.7273	0	0	0
313	29	A	154	1	70	71.5	579.71			0	0	0	0	0	0	0	0	0	0	0	0	0	0	0	0	0	0	0	0	0	0	0	0	0	0	0	0	0	0	0	0	0	0	0	0	0	0	0	0
313	29	A	154	2	70	71.5	581.25	75-100	75-100		21.6028	0	0	0	0	0	19.1111	0	0	0	0	0	8.88889	0	0	0	0	0.888889	0	0	0	0.888889	0	0	0	0	0	0	0	0	2.22222	0.888889	0	0	0	2.22222	0	0	0
313	29	A	155	1	70	71.5	582.76			0	0	0	0	0	0	0	0	0	0	0	0	0	0	0	0	0	0	0	0	0	0	0	0	0	0	0	0	0	0	0	0	0	0	0	0	0	0	0	0
313	29	A	155	2	70	71.5	584.26	75-100	75-100		14.8148	0	0	0	0	0	13.6646	0	0	0	0	0	9.31677	1.24224	0	0	0.621118	0.621118	0	0	0	0.621118	0	0	0	0	0	0	0	0	3.10559	0	0	0	0	1.86335	0	0	0
313	29	A	156	1	76	77.5	585.87	75-100	75-100		9.20635	0	0	0	0	0	13.6364	0	0	0	0	0	4.1958	1.3986	0	0	0	0	0	0	0	0	0	0	0	0	0	0	0	0	0.699301	0	0.34965	0	0	1.04895	0	0	0
313	29	A	157	1	68.5	70	588.845	75-100	75-100		8.43373	0	0	0	0	0	17.1053	0	0	0	0	0	2.63158	1.31579	0	0	0	0	0	0	0	1.31579	0	0	0	0	0	0	0	0	2.63158	0.657895	0	0	0	5.92105	0	0	0
313	29	A	158	1	38	41	591.59	75-100	75-100		0.552486	0	0	0	0	0	7.22222	0	0	0.277778	0	0	6.11111	1.94444	0	0	0	0	0	0	0	0.277778	0	0	0	0	0	0	0	0	2.22222	0	0	0	0	4.16667	0	0	0.277778
313	29	A	159	1	68	70	594.94	75-100	75-100		1.1396	0	0	0	0	0	0	0.288184	0.288184	0	0	0	13.5447	1.15274	0	0	0	0	0	0	0	0	0	0	0	0	0	0	0	0	0	0.288184	0	0	0	2.30548	0	0	0
313	29	A	160	1	78	81	598.09			0	0	0	0	0	0	0	0	0	0	0	0	0	0	0	0	0	0	0	0	0	0	0	0	0	0	0	0	0	0	0	0	0	0	0	0	0	0	0	0
313	29	A	161	1	69	72	601.05			0	0	0	0	0	0	0	0	0	0	0	0	0	0	0	0	0	0	0	0	0	0	0	0	0	0	0	0	0	0	0	0	0	0	0	0	0	0	0	0
313	29	A	161	2	74	77	602.62	75-100	75-100		0	0	0	0	0	0	0	0	0	0	0	0	0	0	0	0	0	0	0	0	0	0	0	0	0	0	0	0	0	0	0	0	0	0	0	90.9091	0	0	0
313	29	A	162	1	77	80	604.18	75-100	75-100		33.3333	0	0	0	0	0	7.69231	0	0	0	0	0	5.76923	0	0	0	0	0	0	0	0	1.92308	0	0	0	0	0	0	1.92308	0	3.84615	3.84615	0	0	0	25	0	0	0
313	29	A	162	2	80	83	605.74				0	0	0	0	0	0	0	0	0	0	0	0	0	0	0	0	0	0	0	0	0	0	0	0	0	0	0	0	0	0	0	0	0	0	0	66.6667	0	0	0
313	29	A	163	1	80	83.5	607.26			0	0	0	0	0	0	0	0	0	0	0	0	0	0	0	0	0	0	0	0	0	0	0	0	0	0	0	0	0	0	0	0	0	0	0	0	0	0	0	0
313	29	A	164	1	75	77	610.26	100-120	100-120		5.81395	0	0	0	0	0	9.87654	0	0	0	0	0	0	1.23457	0	0	7.40741	0	0	0	2.46914	28.3951	0	0	0	0	0	0	0	0	13.5802	3.7037	1.23457	0	0	8.64198	1.23457	0	0
313	29	A	164	2	88	90	611.89			0	0	0	0	0	0	0	0	0	0	0	0	0	0	0	0	0	0	0	0	0	0	0	0	0	0	0	0	0	0	0	0	0	0	0	0	0	0	0	0
313	29	A	166	1	75	77	616.36	100-120	100-120		31.7073	0	0	0	0	0	0	1.42857	0	0	0	0	0	0	0	0	0	0	0	0	7.85714	26.4286	0	0	0	0	0	0	0	0.714286	15	3.57143	2.14286	0	0.714286	34.2857	0	0	0
313	29	A	168	1	75	76.5	622.46	75-100	75-100		12.9534	0	0	0	0	0	27.381	0.595238	1.19048	0	0.595238	0	0	3.57143	1.19048	0	0	0	0	0	0	0	0	0	0	0	0	0	0	0	8.33333	0	5.95238	0	0	4.7619	0	0	0
313	29	A	168	2	75	76.5	623.96	75-100	75-100		24.6269	0	0	0	0	0	8.91089	0	0	0	0	0	0	0.990099	1.9802	0	0	0	0	0	0	0.990099	0	0	0	0	0	0	0	0	22.7723	1.9802	0.990099	0	0	56.4356	0	0	0.990099
313	29	A	169	1	68	69.5	625.34	75-100	80-100		7.10383	0	0.588235	0	0	0	28.2353	0	1.17647	0	0	0	0.588235	0	1.76471	0	0.588235	0	0	0	0.588235	7.05882	0	0	0	0	0	0	0	0	18.2353	5.29412	2.94118	0	0	15.2941	0	0	0
313	29	A	170	1	75	76.5	628.56	75-100	75-100		0	0	0	0	0	0	0	0	0	0	0	0	0	0	0	0	0	0	0	0	0	0	0	0	0	0	0	0	0	0	0	0	0	0	0	66.6667	0	0	0
313	29	A	171	1	75	76.5	631.61	100-120	100-120		18.1818	0	0	0	0	0	1.85185	0	0	0	0	0	5.55556	0	0	0	0	0	0	0	0	27.7778	0	0	0	0	0	0	0	1.85185	0	3.7037	1.85185	0	0	31.4815	0	0	0
313	29	A	171	2	75	76.5	633.13			0	0	0	0	0	0	0	0	0	0	0	0	0	0	0	0	0	0	0	0	0	0	0	0	0	0	0	0	0	0	0	0	0	0	0	0	0	0	0	0
313	29	A	172	1	78	80	634.69			0	0	0	0	0	0	0	0	0	0	0	0	0	0	0	0	0	0	0	0	0	0	0	0	0	0	0	0	0	0	0	0	0	0	0	0	0	0	0	0
313	29	A	173	1	32	33.5	635.55			0	0	0	0	0	0	0	0	0	0	0	0	0	0	0	0	0	0	0	0	0	0	0	0	0	0	0	0	0	0	0	0	0	0	0	0	0	0	0	0
313	29	A	174	1	120.5	123	638.165			0	0	0	0	0	0	0	0	0	0	0	0	0	0	0	0	0	0	0	0	0	0	0	0	0	0	0	0	0	0	0	0	0	0	0	0	0	0	0	0
313	29	A	174	2	50	52	638.96			0	0	0	0	0	0	0	0	0	0	0	0	0	0	0	0	0	0	0	0	0	0	0	0	0	0	0	0	0	0	0	0	0	0	0	0	0	0	0	0
313	29	A	175	1	77	78.5	640.78			0	0	0	0	0	0	0	0	0	0	0	0	0	0	0	0	0	0	0	0	0	0	0	0	0	0	0	0	0	0	0	0	0	0	0	0	0	0	0	0
313	29	A	175	2	77	78.5	642.29	75-100	75-80		0	0	0	0	0	0	0	0	0.877193	0	0	0	0	34.2105	0	0	0	0	0	0	0	3.50877	0	0	0	1.75439	0	0	0	0	10.5263	0	2.63158	0	0	14.0351	0	0	0
313	29	A	176	1	42	44	643.48	75-100	75-100		1.25786	0	0	0	0	0	0	0	0	0	0	0	0	17.1975	0	0	0	0	0	0	0	3.82166	0	0	0	1.27389	0	0	0	0	7.00637	0	0	0	2.54777	8.28025	0	0	0
313	29	A	178	1	64	66	649.8	75-100	75-100		19.1781	0	0	0	0	0	0	0	0.564972	0	0	0.564972	0	15.8192	0	0	0	0	0	0	0	4.51977	0	0	0	6.21469	0	0	0	0	8.47458	1.12994	0	0	0.564972	7.9096	0	0	0
313	29	A	179	1	68	70	650.13			0	0	0	0	0	0	0	0	0	0	0	0	0	0	0	0	0	0	0	0	0	0	0	0	0	0	0	0	0	0	0	0	0	0	0	0	0	0	0	0
313	29	A	179	2	59	61	651.53	75-100	75-100		0	0	0	0	0	0	0	0	0	0	0	0	0	4.5977	0	0	0	0	0	0	0	0	0	0	0	0	0	0	0	0	4.5977	0	0	0	0	0	0	0	0
313	29	A	180	1	102	106	653.23	75-100	75-100		34.5455	0	0	0	0	0	0	0	0	0	0	0	0	10.1852	0	0	0	0	0	0	0	0	0	0	0	2.77778	0	0	0	0	4.62963	0	4.62963	0	0.925926	0	0	0	0
313	29	A	181	1	77	80	656.03	75-100	75-100		4.66667	0	0	0	0	0	0	0	0	0	0	0	0	6.29371	0	0	0	0	0	0	0	0.699301	0	0	0	4.1958	0	0	0	1.3986	10.4895	0	0.699301	0	0	8.39161	0	0	0
313	29	A	182	1	62	66	658.93	75-100	75-100		2.22222	0	0	0	0	0	0	0	0	0	0	0	0.757576	11.3636	0	0	0	0	0	0	0	0	0	0	0	2.27273	0	0	0	0	8.33333	0.757576	0.757576	0	0	2.27273	0	0	0
313	29	A	183	1	77	80	662.13			0	0	0	0	0	0	0	0	0	0	0	0	0	0	0	0	0	0	0	0	0	0	0	0	0	0	0	0	0	0	0	0	0	0	0	0	0	0	0	0
313	29	A	183	2	75	78	663.62			0	0	0	0	0	0	0	0	0	0	0	0	0	0	0	0	0	0	0	0	0	0	0	0	0	0	0	0	0	0	0	0	0	0	0	0	0	0	0	0
313	29	A	184	1	109	113	665.5			0	0	0	0	0	0	0	0	0	0	0	0	0	0	0	0	0	0	0	0	0	0	0	0	0	0	0	0	0	0	0	0	0	0	0	0	0	0	0	0
313	29	A	184	2	9	13	666			0	0	0	0	0	0	0	0	0	0	0	0	0	0	0	0	0	0	0	0	0	0	0	0	0	0	0	0	0	0	0	0	0	0	0	0	0	0	0	0
313	29	A	185	1	18	22	666.94			0	0	0	0	0	0	0	0	0	0	0	0	0	0	0	0	0	0	0	0	0	0	0	0	0	0	0	0	0	0	0	0	0	0	0	0	0	0	0	0
313	29	A	186	1	76	80	668.22			0	0	0	0	0	0	0	0	0	0	0	0	0	0	0	0	0	0	0	0	0	0	0	0	0	0	0	0	0	0	0	0	0	0	0	0	0	0	0	0
313	29	A	186	2	82	85	669.78			0	0	0	0	0	0	0	0	0	0	0	0	0	0	0	0	0	0	0	0	0	0	0	0	0	0	0	0	0	0	0	0	0	0	0	0	0	0	0	0
313	29	A	186	3	9	12	670.38			0	0	0	0	0	0	0	0	0	0	0	0	0	0	0	0	0	0	0	0	0	0	0	0	0	0	0	0	0	0	0	0	0	0	0	0	0	0	0	0
313	29	A	187	1	114	119	671.65			0	0	0	0	0	0	0	0	0	0	0	0	0	0	0	0	0	0	0	0	0	0	0	0	0	0	0	0	0	0	0	0	0	0	0	0	0	0	0	0
313	29	A	187	2	8	11	672.06			0	0	0	0	0	0	0	0	0	0	0	0	0	0	0	0	0	0	0	0	0	0	0	0	0	0	0	0	0	0	0	0	0	0	0	0	0	0	0	0
313	29	A	188	1	70	73	672.41			0	0	0	0	0	0	0	0	0	0	0	0	0	0	0	0	0	0	0	0	0	0	0	0	0	0	0	0	0	0	0	0	0	0	0	0	0	0	0	0
313	29	A	190	1	68	69.5	677.29	25-80	50-80		58.9041	0	0	0	0	0	0	1.11111	0	21.1111	0	0	0	14.4444	3.33333	0	0	0	0	0	0	0	0	0	0	0	0	0	1.11111	1.11111	45.5556	0	0	0	1.11111	2.22222	0	0	0
313	29	A	191	1	65.5	67	680.315	75-120	100-110		51.6432	0	0	0	0	0	0	1.94175	0	2.91262	0	0	0	7.76699	0.970874	0	0	0	0	0	0	21.3592	0	0	0	0	0	0	0	0.970874	23.301	1.94175	0	0	0	5.82524	0	0	0
313	29	A	192	1	75	76.5	683.46			0	0	0	0	0	0	0	0	0	0	0	0	0	0	0	0	0	0	0	0	0	0	0	0	0	0	0	0	0	0	0	0	0	0	0	0	0	0	0	0
313	29	A	192	2	59	60.5	684.81			0	0	0	0	0	0	0	0	0	0	0	0	0	0	0	0	0	0	0	0	0	0	0	0	0	0	0	0	0	0	0	0	0	0	0	0	0	0	0	0
313	29	A	192	3	28.5	30	685.745			0	0	0	0	0	0	0	0	0	0	0	0	0	0	0	0	0	0	0	0	0	0	0	0	0	0	0	0	0	0	0	0	0	0	0	0	0	0	0	0
313	29	A	193	1	78	79.5	686.54	100-120	100-120		0	0	0	0	0	0	0	0	0	0	0	0	0	0	0	0	0	0	0	0	0	18.75	0	0	0	0	0	0	0	0	18.75	0	0	0	0	0	0	0	0
313	29	A	193	2	79	80.5	688.06	75-120	90-110		2.77778	0	0.714286	0	0	0	0	0	0	0	0	2.14286	0	2.85714	0	0	0	0	0	0	0.714286	12.1429	0	0	0	0	0	0	0	0	25.7143	0	0.714286	0	1.42857	20	2.85714	0	0
313	29	A	194	1	76	77.5	689.57			0	0	0	0	0	0	0	0	0	0	0	0	0	0	0	0	0	0	0	0	0	0	0	0	0	0	0	0	0	0	0	0	0	0	0	0	0	0	0	0
313	29	A	194	2	76	77.5	691.08	75-120	100-110		0.636943	0	0.641026	0	0	0	0	0	0.641026	0	0	0	0	2.5641	0.641026	0	0	0	0.641026	0	0	41.6667	0	0.641026	0	0	0	0	0	0	10.2564	1.28205	0	0	0.641026	6.41026	0	0	0
313	29	A	195	1	76	77.5	692.62	75-120	100-110		0.27933	0	0	0	0	0	0	0	0	3.36134	0	0	0	1.12045	0.280112	0	0	0	0.840336	0	0.280112	23.8095	0	0	0	0	0	0.280112	0	0	3.92157	1.12045	0	0	3.08123	4.48179	0.840336	0	0
313	29	A	195	2	76	77.5	694.12	75-120	90-110		0	0	0	0	0	0	0	0	0	2.05128	0	0	0	0.34188	24.1026	0	0	0	0.17094	0	0	6.15385	0	0	0	0	0	0	0.512821	0	3.24786	0.17094	0	0	0.683761	5.81197	0	0.34188	0
313	29	A	195	3	15.5	17	695.015	75-120	90-110		3.96825	0	0	0	0	0	0	0	0	0	0	0	0	0	26.8595	0	0	0	0	0	0	10.3306	0	0	0	0	0	0	0	0	0	1.23967	0	0	1.23967	22.314	2.06612	0.413223	0
313	29	A	196	1	69	70.5	695.6	75-100	80-100		0	0	0	0	0	0	0	2.0202	1.0101	0	0	0	0	1.0101	0	0	0	0	0	0	0	7.07071	0	0	0	0	0	0	0	0	6.06061	0	1.0101	0	0	12.1212	0	0	0
313	29	A	196	2	64	65	697.07	100-120	100-120		7.92079	0	0.537634	0	0	0	0	0	0	0	0	0	0	0	25.2688	0	0	0	0	0	0	18.8172	0	0	0	0	0	0	0	0	1.6129	0.537634	0	0	0.537634	25.2688	0	0.537634	3.76344
313	29	A	197	1	61.5	63	698.575	75-120	90-110		0	0	0	0	0	0	0	8.73016	0	0	0	0	0	15.0794	0	0	0	0	0	0	0.793651	19.8413	0	0	0	0	0	0	0	0	0.793651	0	0.793651	0	0	0	0	0	0
313	29	A	197	2	61.5	63	700.075			0	0	0	0	0	0	0	0	0	0	0	0	0	0	0	0	0	0	0	0	0	0	0	0	0	0	0	0	0	0	0	0	0	0	0	0	0	0	0	0
313	29	A	198	1	70	71.5	701.71			0	0	0	0	0	0	0	0	0	0	0	0	0	0	0	0	0	0	0	0	0	0	0	0	0	0	0	0	0	0	0	0	0	0	0	0	0	0	0	0
313	29	A	198	2	70	71.5	703.2			0	0	0	0	0	0	0	0	0	0	0	0	0	0	0	0	0	0	0	0	0	0	0	0	0	0	0	0	0	0	0	0	0	0	0	0	0	0	0	0
313	29	A	199	1	73	74.5	704.79			0	0	0	0	0	0	0	0	0	0	0	0	0	0	0	0	0	0	0	0	0	0	0	0	0	0	0	0	0	0	0	0	0	0	0	0	0	0	0	0
313	29	A	199	2	73	74.5	706.29			0	0	0	0	0	0	0	0	0	0	0	0	0	0	0	0	0	0	0	0	0	0	0	0	0	0	0	0	0	0	0	0	0	0	0	0	0	0	0	0
313	29	A	200	1	20	22	707.31			0	0	0	0	0	0	0	0	0	0	0	0	0	0	0	0	0	0	0	0	0	0	0	0	0	0	0	0	0	0	0	0	0	0	0	0	0	0	0	0
313	29	A	201	1	65	67	710.81			0	0	0	0	0	0	0	0	0	0	0	0	0	0	0	0	0	0	0	0	0	0	0	0	0	0	0	0	0	0	0	0	0	0	0	0	0	0	0	0
313	29	A	202	1	53	55	712.31	75-100	75-100		0.840336	0	0	0	0	0	0	5.9322	3.38983	0	0	0	0	8.47458	2.54237	0	0	0	0	0	0.847458	4.23729	0	0	0	0	0	0	0	0	0	0.847458	0	0	0	2.54237	0	0	0
313	29	A	202	2	37	39	713.27			0	0	0	0	0	0	0	0	0	0	0	0	0	0	0	0	0	0	0	0	0	0	0	0	0	0	0	0	0	0	0	0	0	0	0	0	0	0	0	0
313	29	A	203	1	63	66	713.84	75-100	75-100		0	0	0	0	0	0	0	5.07152	0.910273	0.130039	0	0	0	10.4031	2.21066	0	0	0	0	0	0.130039	4.42133	0.130039	0	0	0	0	0	0	0.650195	0	3.25098	0	0	0.390117	2.08062	0	0	0
313	29	A	203	2	41	43	714.94	75-120	90-110		0.534759	0	0	0	0	0	0	0	1.07527	0	0	0	0	1.6129	0	0	0	0	0	0	0	24.7312	0	0.537634	0	0	0	0	0	0	0	1.07527	0	0	0.537634	2.15054	1.07527	0	0
313	29	A	204	1	38	40	716.64			0	0	0	0	0	0	0	0	0	0	0	0	0	0	0	0	0	0	0	0	0	0	0	0	0	0	0	0	0	0	0	0	0	0	0	0	0	0	0	0
313	29	A	205	1	40	42	719.71	75-100	75-100		0	0	0	0	0	0	0	0	0	0	10.8911	0	0	1.9802	0	0	0	0	0	0	0	0.990099	0	0.330033	0	0	0	0	0	0	0	3.9604	0	0	0	2.31023	0	0	0
313	29	A	205	2	26	28	721.08	75-100	75-100		0.458716	0	0	0	0	0	0	0	0	0	0	0	0	1.84332	0	0	0	0	0	0	0	0.921659	0.460829	0	0	0	0	0	0	0	0	5.52995	0	0	0.460829	1.38249	0	0	0
313	29	A	207	1	75	77	726.16			0	0	0	0	0	0	0	0	0	0	0	0	0	0	0	0	0	0	0	0	0	0	0	0	0	0	0	0	0	0	0	0	0	0	0	0	0	0	0	0
313	29	A	207	2	75	77	727.67			0	0	0	0	0	0	0	0	0	0	0	0	0	0	0	0	0	0	0	0	0	0	0	0	0	0	0	0	0	0	0	0	0	0	0	0	0	0	0	0
313	29	A	207	3	23	25	728.46			0	0	0	0	0	0	0	0	0	0	0	0	0	0	0	0	0	0	0	0	0	0	0	0	0	0	0	0	0	0	0	0	0	0	0	0	0	0	0	0
313	29	A	208	2	21	25	730.17	50-100	50-80		2.28571	0	0	0	0.584795	0	0	0	0	0	0	0	0	11.6959	0.584795	0	0	0	0	0	0	4.67836	0	0.584795	0	0	0	0	0	1.75439	0	21.6374	0	0	0.584795	7.60234	0	0	0
313	29	A	209	1	13	17	731.64			0	0	0	0	0	0	0	0	0	0	0	0	0	0	0	0	0	0	0	0	0	0	0	0	0	0	0	0	0	0	0	0	0	0	0	0	0	0	0	0
313	29	A	209	2	86	90	733.9			0	0	0	0	0	0	0	0	0	0	0	0	0	0	0	0	0	0	0	0	0	0	0	0	0	0	0	0	0	0	0	0	0	0	0	0	0	0	0	0
313	29	A	209	3	15	19	734.69			0	0	0	0	0	0	0	0	0	0	0	0	0	0	0	0	0	0	0	0	0	0	0	0	0	0	0	0	0	0	0	0	0	0	0	0	0	0	0	0
313	29	A	210	1	72	75	735.28	>0-10	>0-10	0	100	0	0	0	0	0	0	0	0	0	0	0	0	0	0	0	0	0	0	0	0	0	0	0	0	0	0	0	0	0	0	0	0	0	0	0	0	0	0
313	29	A	210	2	74	77	736.8			0	0	0	0	0	0	0	0	0	0	0	0	0	0	0	0	0	0	0	0	0	0	0	0	0	0	0	0	0	0	0	0	0	0	0	0	0	0	0	0
313	29	A	210	3	15	18	737.71			0	0	0	0	0	0	0	0	0	0	0	0	0	0	0	0	0	0	0	0	0	0	0	0	0	0	0	0	0	0	0	0	0	0	0	0	0	0	0	0
313	29	A	211	1	77	80	738.38			0	0	0	0	0	0	0	0	0	0	0	0	0	0	0	0	0	0	0	0	0	0	0	0	0	0	0	0	0	0	0	0	0	0	0	0	0	0	0	0
313	29	A	211	2	40	43	739.51			0	0	0	0	0	0	0	0	0	0	0	0	0	0	0	0	0	0	0	0	0	0	0	0	0	0	0	0	0	0	0	0	0	0	0	0	0	0	0	0
313	29	A	212	1	72	75	741.38	75-100	75-100		0	29.4118	0	0	0	0	0	0	0	0	0	0	0	0	0	0	0	0	0	0	0	0	0	0	0	0	0	0	0	0	0	0	0	0	0	17.6471	0	0	0
313	29	A	212	2	80	83	742.96			0	0	0	0	0	0	0	0	0	0	0	0	0	0	0	0	0	0	0	0	0	0	0	0	0	0	0	0	0	0	0	0	0	0	0	0	0	0	0	0
313	29	A	213	1	17	20	743.88	75-100	75-100		0.217391	0	0	0	0	0	0	0	0	0	0	0	0	5.88235	0	0	0	0	0	0	0	0.87146	0.87146	0	0	0	0	0	0	0	0	1.08932	0	0	0.43573	6.53595	0	0	0
313	29	A	215	2	67	68.5	749.14	75-100	75-100		0	0	0	0	0	0	0	0	1.02564	0	0	0	0	7.17949	0	0.512821	0	0	0	0	0	0	4.10256	0	0	0	0	0	0	0	0	0	0	0	3.07692	17.9487	0	0	0
313	29	A	217	1	76	78	753.62	50-80	50-80		0	0	0	0	0	0	0	0	1.38889	0	0	0	0	47.2222	0	0	0	0	0	0	0	4.16667	6.94444	0	0	0	0	0	0	0	0	9.72222	0	0	1.38889	8.33333	0	0	0
313	29	A	217	2	78	79.5	755.16	75-100	80-100		0	0	0	0	0	0	0	0	0	0	0	0	0	3.48837	0	0	0	0	0	0	0	0	0	0	0	0	0	0	0	0	0	0	0	0	1.16279	0	0	0	0
313	29	A	217	3	8	10.5	755.95	50-80	50-75		0	0	0	0	0	0	0	0	0	0	0	0	0	54.6875	0	0	0	0	0	0	0	0	3.125	0	0	0	0	0	0	0	0	0	0	0	7.8125	4.6875	0	0	1.5625
[truncated: 26 more columns]
